# Supplementary material
Source: PubMed Central journal article supplement (PMC5325708)
Supplement: NIHMS847011-supplement.pdf [file NIHMS847011-supplement.pdf]

Figure S1

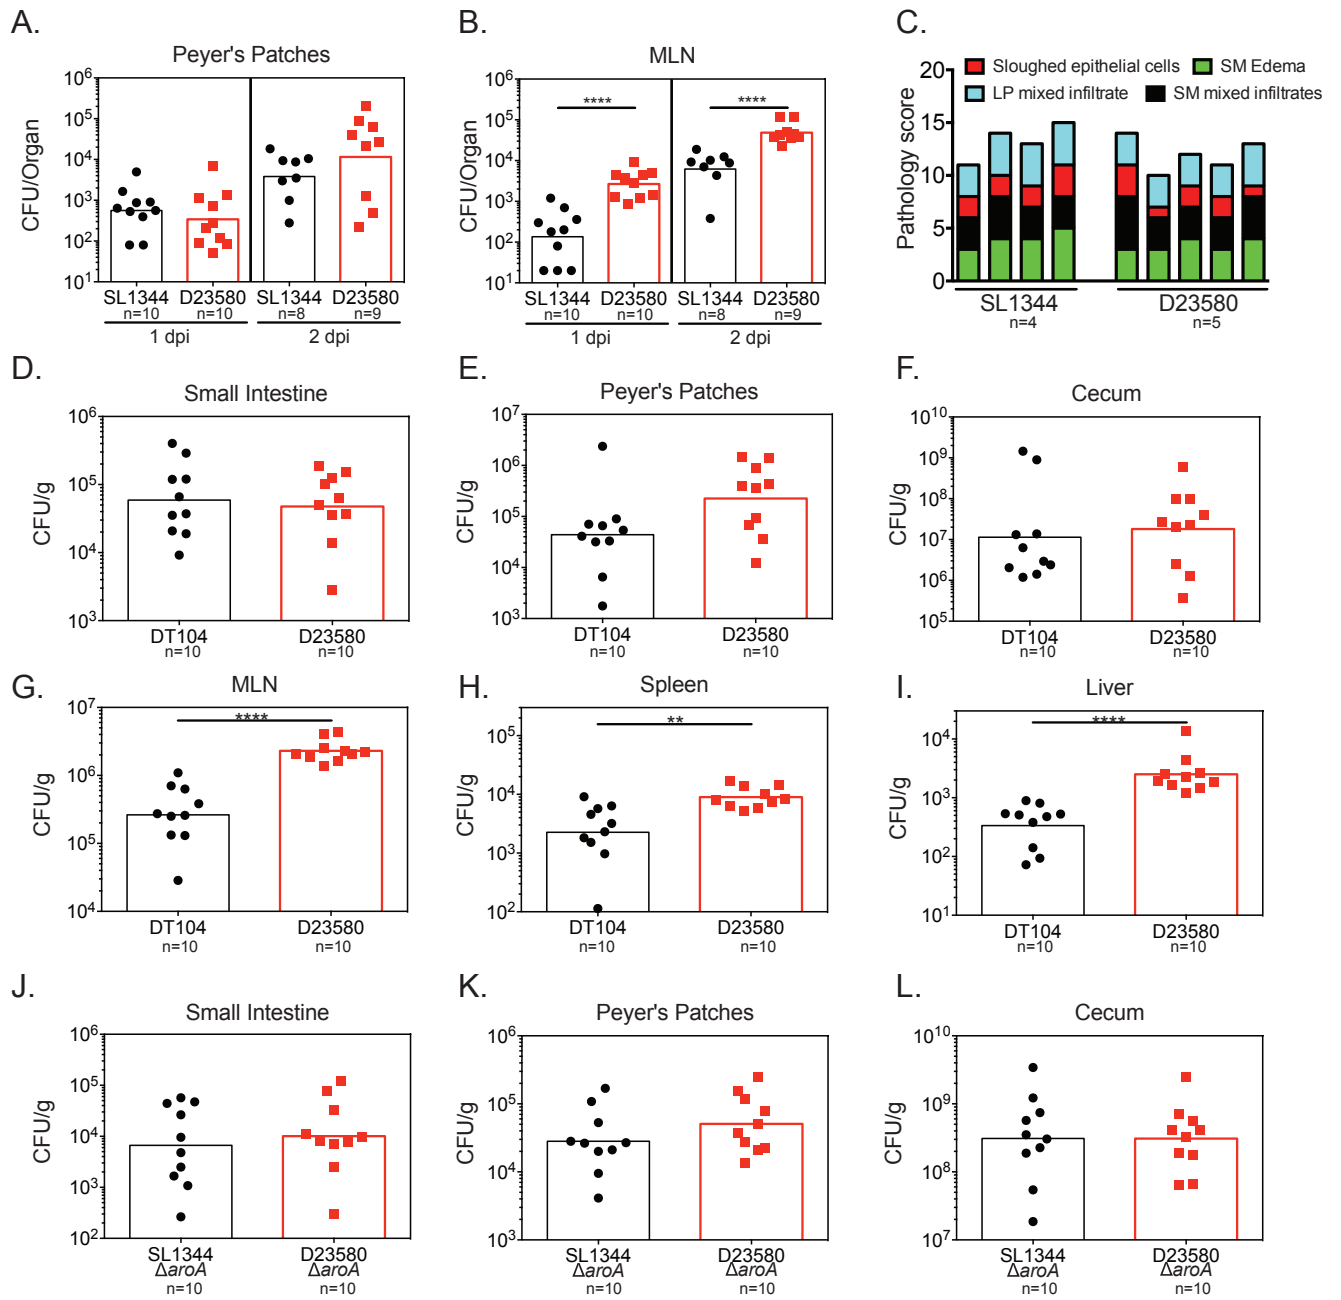

Figure S2

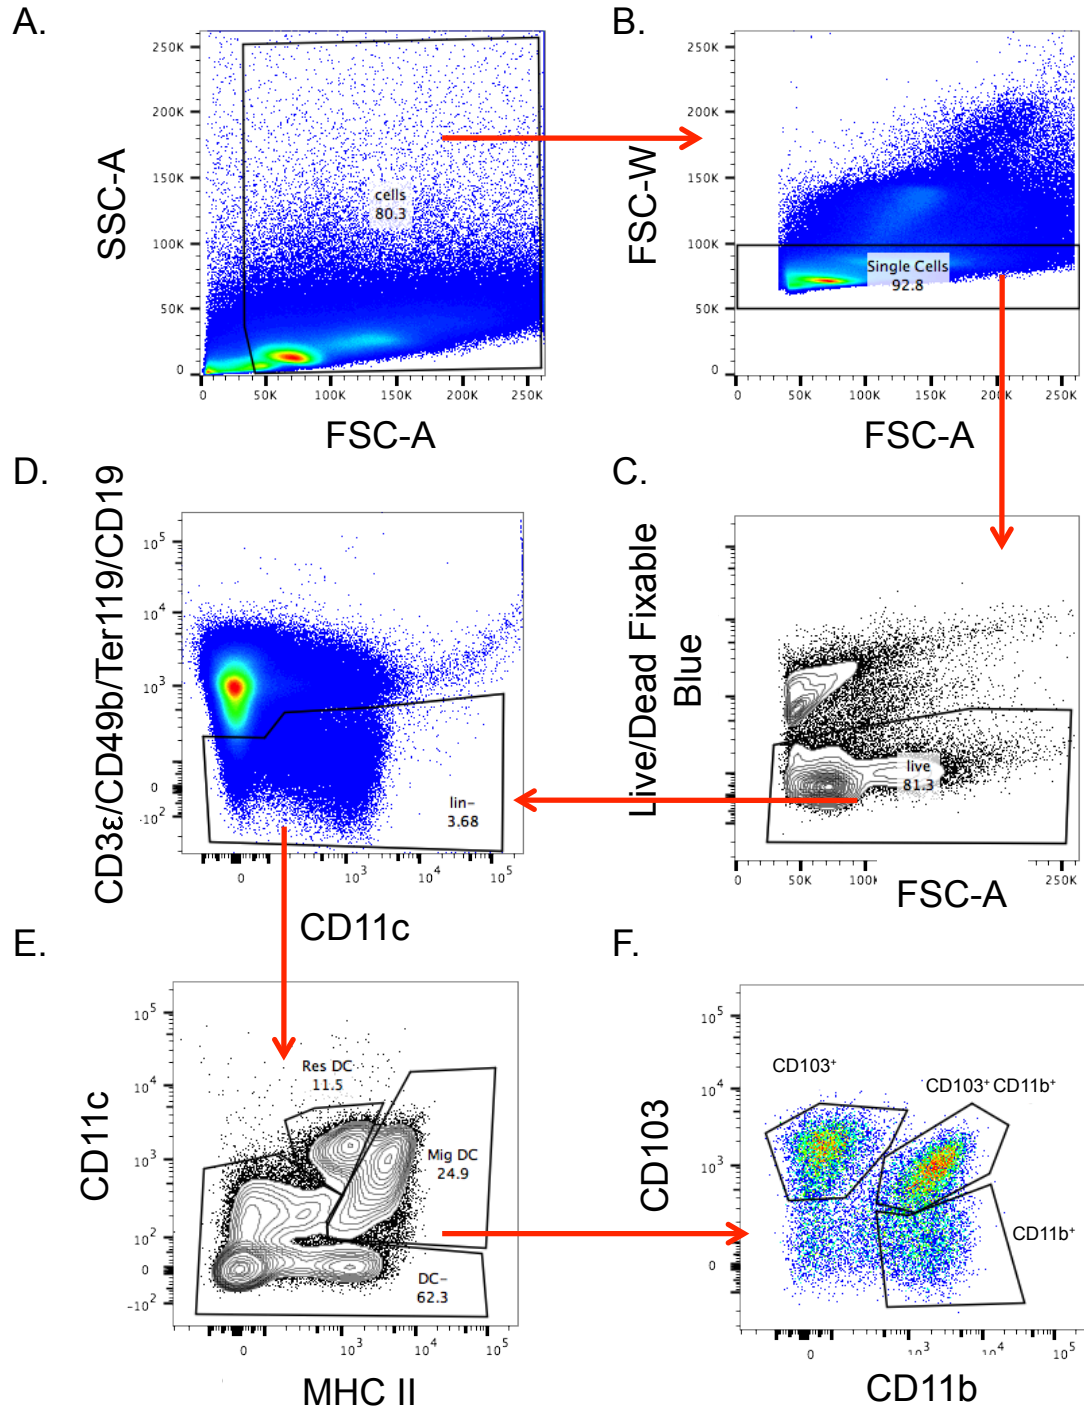

Figure S3

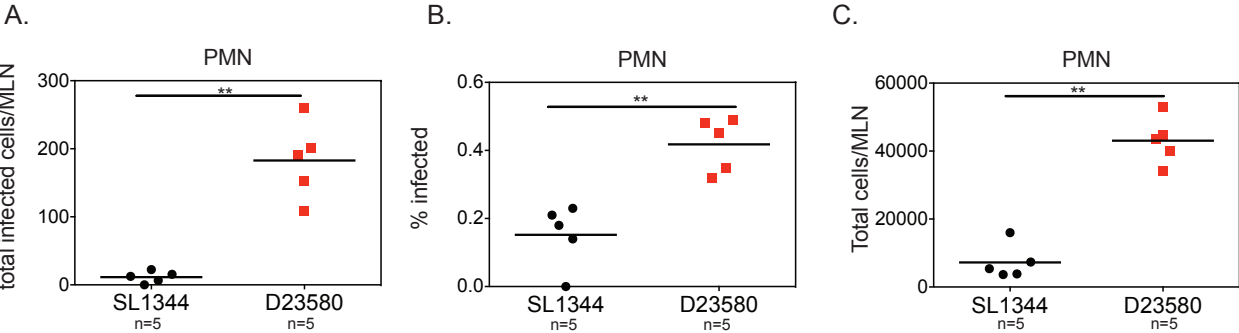

Figure S4

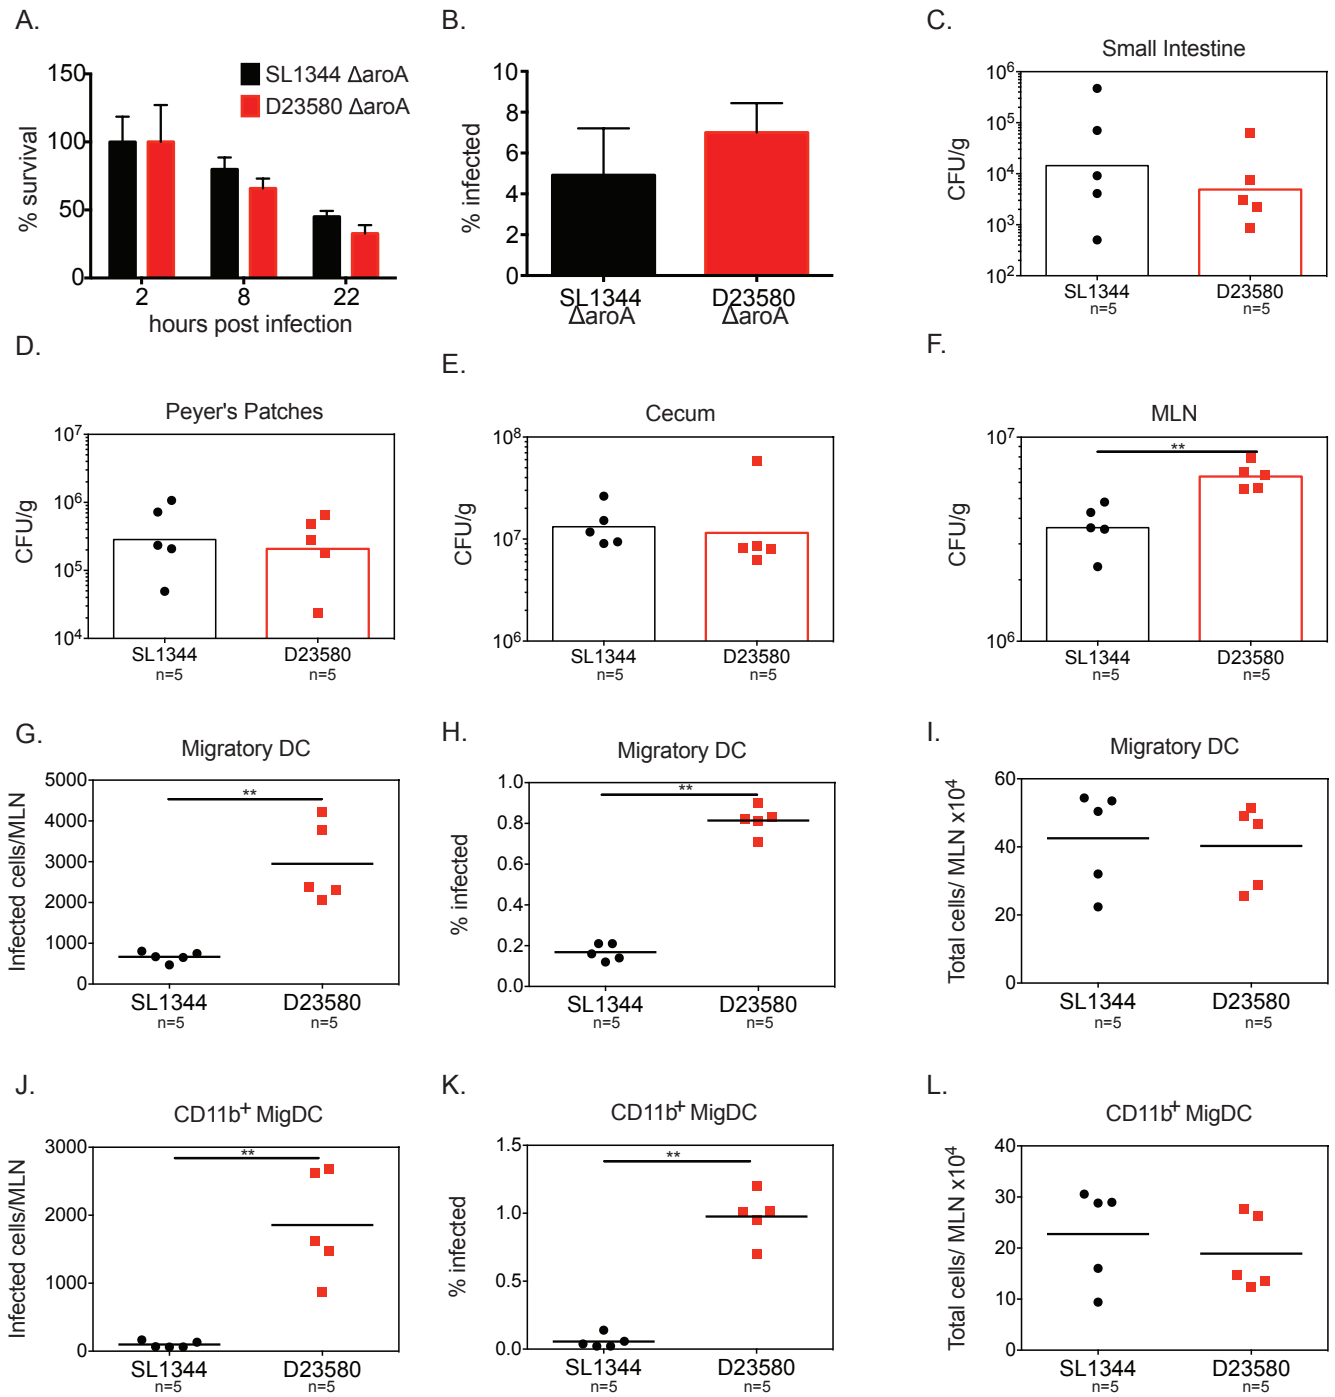

Figure S5

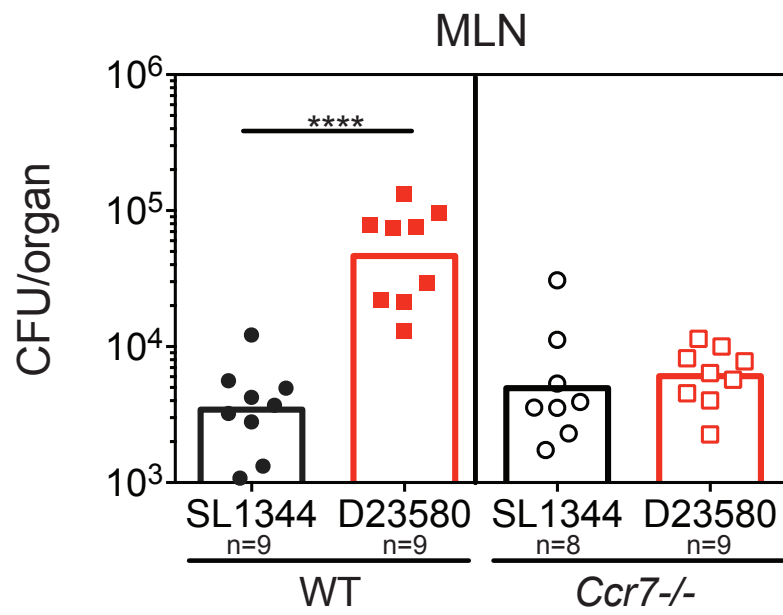

Figure S6

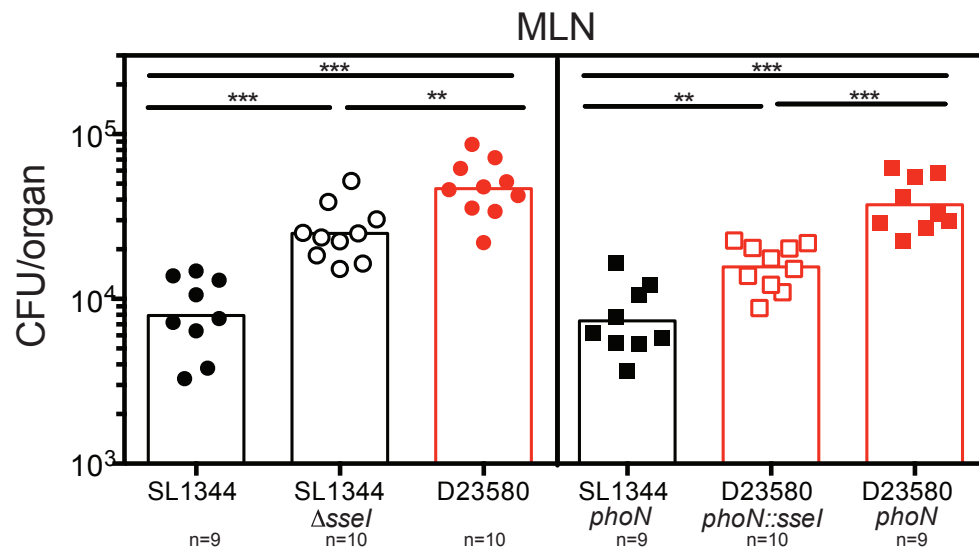

1 **Supplemental Figure Legends**

2

3 **Figure S1, related to Figure 1: D23580 hyperdisseminates to systemic sites**  
4 **compared to gastroenteritis outbreak isolate DT104**

5 **(A-B)** WT C57BL/6 mice were given 20 mg of streptomycin orogastrically (o.g) at -d1.  
6 The next day mice were infected with  $10^8$  CFU of either ST19 SL1344 or ST313 D23580  
7 o.g. Mice were sacrificed at 1 and 2 days post infection (dpi), and *Salmonella* burden was  
8 enumerated by plating. The CFU/organ for Peyer's patches (A) and MLN (B) are  
9 presented. Data is the combination of two independent experiments with 4-5 mice per  
10 group. Geometric mean is presented for each group. **(C)** Mice were infected as in A and  
11 sacrificed at 2 dpi. The cecal tip was removed and prepared for histopathological  
12 analysis. Hematoxylin and eosin stained sections were evaluated by a blinded pathologist  
13 and the cumulative pathology score is presented. Data from a representative experiment  
14 is presented. Each bar represents a single mouse. Two independent experiments were  
15 performed with 4-5 mice per group. **(D-I)** WT C57BL/6 mice were given 20 mg of  
16 streptomycin o.g at -d1. The next day mice were infected with  $10^8$  CFU of either ST19  
17 DT104 or ST313 D23580 o.g. Mice were sacrificed at 2 dpi and *Salmonella* burden was  
18 enumerated by plating. CFU/g for gut tissues (D-F) and systemic sites (G-I) are  
19 presented. Data is the combination of two independent experiments with 4-5 mice per  
20 group. Geometric mean is presented for each group. **(J-L)** WT C57BL/6 mice were  
21 given 20 mg of streptomycin o.g at -d1. The next day mice were infected with  $10^9$  CFU  
22 of either ST19 SL1344  $\Delta$ aroA or ST313 D23580  $\Delta$ aroA o.g. Mice were sacrificed at 2  
23 dpi, and *Salmonella* burden was enumerated by plating. CFU/g for gut tissues are

24 presented (J-L). Data is the combination of two independent experiments with 4-5 mice  
25 per group. Geometric mean is presented for each group. (A-L) Statistical significance  
26 was determined using Mann-Whitney. \*  $P \leq 0.05$ , \*\*  $P \leq 0.01$ , \*\*\*  $P \leq 0.001$ , \*\*\*\*  
27  $P \leq 0.0001$ .

28

29 **Figure S2, related to Figure 2: Gating strategy for MLN migratory dendritic cells**

30 Cells were first gated based on size (A), then for single cells (B) Next live cells were  
31 selected by gating on those cells negative for Live/Dead Fixable Blue, a stain marking  
32 dead cells (C). Then B cells, T cells, NK cells, and red blood cells were excluded (D).  
33 Migratory dendritic cells were then identified by variable CD11c expression and high  
34 MHC II expression (E). Migratory dendritic cell subsets were then identified on the basis  
35 of their expression of the integrins CD103 and CD11b (F).

36

37 **Figure S3, related to Figure 2: D23580 infects more PMN in the MLN**

38 (A-C) WT C57BL/6 were given 20 mg of streptomycin o.g at -d1. The next day mice  
39 were infected with  $10^8$  CFU of each respective *Salmonella* isolate o.g. Mice were  
40 sacrificed at 2 days post infection. MLN were removed and digested to form single cell  
41 suspensions which were stained for cell surface markers and Salmonella and analyzed by  
42 flow cytometry. Total infected PMN per MLN (A), Percent infected PMN (B) and total  
43 number of PMN per MLN (C) are presented. Data shown is from representative  
44 experiment with 5 mice per group out of 2 independent experiments. The line indicates  
45 the mean and statistical significance was determined using Mann-Whitney. \*  $P \leq 0.05$ , \*\*  
46  $P \leq 0.01$ .



47 **Figure S4, related to Figures 2&3: Differences in *Salmonella* survival or**  
48 **inflammasome activation do not mediate higher *Salmonella* burden in the MLN for**  
49 **D23580**

50 **(A)** Bacterial survival was quantified over time. Differentiated bone marrow-derived  
51 DCs (BMDCs) were seeded overnight at  $2.5 \times 10^5$  cells/well in 24 well plates. The  
52 indicated *Salmonella* strains were centrifuged onto the BMDCs at a multiplicity of  
53 infection of 10 and allowed to infect for 30 min. Gentamicin was then added to BMDC  
54 media to a final concentration of 100  $\mu\text{g/ml}$  for 1.5 hrs. At 2 hours post infection (hpi)  
55 either intracellular bacteria was enumerated or BMDCs were washed, and given BMDC  
56 media containing 10  $\mu\text{g/ml}$  gentamicin. Intracellular CFU was determined at 2, 8 and 22  
57 hpi. To evaluate intracellular CFU, BMDCs were washed, lysed, and bacteria were  
58 enumerated by plating. The percent survival is normalized to the amount of intracellular  
59 bacteria at 2 hpi. **(B)** BMDCs were infected and the number of intracellular bacteria was  
60 determined at 2 hpi as in **A**. The percent invasion, quantified as the percent of  
61 intracellular bacteria over the initial input, is presented in **B**. **(A-B)** Bars represent the  
62 mean and standard deviation for each isolate. Experiments were repeated at least 5 times,  
63 and data shown is from a representative experiment with at least 3 biological replicates  
64 per time point. Statistical significance was determined using an unpaired t test with  
65 Welch's correction. \*  $P \leq 0.05$ . **(C-L)** Streptomycin-pretreated *Casp1/11*<sup>-/-</sup> mice were  
66 orally infected with each *Salmonella* isolate. Mice were sacrificed at 2 dpi, and  
67 *Salmonella* burden was enumerated by plating (C-F). The CFU/g for gut tissues (C-E)  
68 and MLN (F) are presented. **(G-L)** Single cell suspensions of the MLN were stained for  
69 cell surface markers and intracellular *Salmonella*. The total amount of infected cells per

70 MLN (G,J), percent infected (H,K) and total number of cells recruited to the MLN (I, L)  
71 are shown for all migDC (G-I) and the CD11b+ migDC subset (J-L), respectively. (C-L)  
72 Data presented are from a representative experiment. Two independent experiments with  
73 3-5 mice per group were performed. The geometric mean for each group is shown and  
74 statistical significance was determined by the Mann-Whitney test. \*  $P \leq 0.05$ , \*\*  $P \leq 0.01$ .

75

76 **Figure S5, related to Figure 5: CCR7-dependent cell migration is necessary for**  
77 **hyperdissemination by ST313 *S. Typhimurium* to the MLN**

78 Streptomycin-pretreated WT C57BL/6 or *Ccr7*<sup>-/-</sup> mice were orally infected with each  
79 *Salmonella* isolate. Mice were sacrificed at 2 dpi and *Salmonella* burden was enumerated  
80 by plating. The CFU/organ for the MLN is presented. Data presented are the combination  
81 of 2 independent experiments with 4-5 mice per group. The geometric mean is shown and  
82 statistical significance was determined by the Mann-Whitney test. \*  $P \leq 0.05$ , \*\*  $P \leq 0.01$ .

83

84 **Figure S6, related to Figure 6: The presence on an intact *sseI* gene lowers the total**  
85 **burden in the MLN**

86 Streptomycin-pretreated C57BL/6 mice were orally infected with each respective  
87 *Salmonella* strain. To genetically dissect the effect of pseudogenization of *sseI*, a clean  
88 deletion of *sseI* was made in ST19 background and D23580 was complemented with a  
89 functional copy of *SseI*. Mice were sacrificed 2 dpi, and *Salmonella* burden was  
90 enumerated by plating. CFU/organ for the MLN of each strain is shown. Data presented  
91 are the combination of 2 independent experiments with 4-5 mice per group. The

92 geometric mean for each group is shown and statistical significance was determined by  
93 the Mann-Whitney test. \*  $P \leq 0.05$ , \*\*  $P \leq 0.01$ , \*\*\*  $P \leq 0.001$ .

94

95

96

97

98

99

100

101

102

103

104

105

106

**Table S1:** Summary of studies examining relative pathogenesis of ST19 and ST313 *S. Typhimurium* isolates in animal models (related to Figure 1)

| Animal       | Infection Model                                                                                                               | Results at Systemic sites                                                                                                       | Authors                 |
|--------------|-------------------------------------------------------------------------------------------------------------------------------|---------------------------------------------------------------------------------------------------------------------------------|-------------------------|
| Balb/C mice  | Single infections with ST19 SL1344 or ST313 D23580                                                                            | ST313 D23580 had a lower LD50 than that reported for ST19 isolates. ST313 D23580 had higher levels in the spleen at 3 and 5 dpi | Yang et al., 2015       |
| CBA/J mice   | Streptomycin pre-treated mice were coinfectd with a 1:1 mixture of ST19 isolate IR715 and ST313 isolate D23580 by oral gavage | ST313 D23580 outcompeted ST19 IR715 in the MLN at 1 dpi and in the spleen and liver at 4 dpi                                    | Singletary et al., 2016 |
| C57BL/6 mice | Mice were singly infected with ST19 isolates SL1344 and various ST313 isolates by oral gavage                                 | Trend towards most ST313 isolates having a higher load in the liver at 4 dpi than ST19 isolate SL1344                           | Okoro et al., 2015      |
| Chicken      | 2-week old chicks were infected orally with single isolates of ST19 and ST313                                                 | One ST313 isolate, D23580, had higher levels in the spleen than two ST19 isolates at 3 and 7 dpi                                | Parsons et al., 2013    |

**Table S2:** *S. Typhimurium* and *E. coli* stains and plasmids used in this study (related to *Bacterial strains and plasmids* section in *Experimental Procedures*)

| <b>S. Typhimurium stains used in this study</b> |                                                                                                                                                                                                                       |                             |
|-------------------------------------------------|-----------------------------------------------------------------------------------------------------------------------------------------------------------------------------------------------------------------------|-----------------------------|
| Strain Name                                     | Genotype                                                                                                                                                                                                              | Reference                   |
| SL1344                                          | ST19, common laboratory <i>S. Typhimurium</i> strain                                                                                                                                                                  | (Hoiseth and Stocker, 1981) |
| D23580                                          | ST313, isolated from patient's blood in 2004, in Malawi                                                                                                                                                               | (Kingsley et al., 2009)     |
| DT104                                           | ST19, epidemic gastroenteritis strain,                                                                                                                                                                                | ATCC 700408                 |
| SL1344 $\Delta$ aroA                            | ST19, SL1344 $\Delta$ aroA::kan                                                                                                                                                                                       | This study                  |
| D23580 $\Delta$ aroA                            | ST313, D23580 $\Delta$ aroA::kan                                                                                                                                                                                      | This study                  |
| SL1344 $\Delta$ ssel                            | ST19, SL1344 $\Delta$ ssel::kan                                                                                                                                                                                       | (McLaughlin et al., 2009)   |
| SL1344 <i>phoN</i> ::kan                        | ST19, SL1344 $\Delta$ <i>phoN</i> ::kan                                                                                                                                                                               | This study                  |
| D23580 <i>phoN</i> ::kan                        | ST313, D23580 $\Delta$ <i>phoN</i> ::kan                                                                                                                                                                              | This study                  |
| D23580 <i>phoN</i> ::ssel                       | ST313, D23580 $\Delta$ <i>phoN</i> ::ssel-kan                                                                                                                                                                         | This study                  |
| <b>E. coli strains used in this study</b>       |                                                                                                                                                                                                                       |                             |
| Strain Name                                     | Genotype                                                                                                                                                                                                              | Reference                   |
| GTW230                                          | <i>E. coli</i> S17-1 $\lambda$ pir with plasmid pGW6, which has an Amp <sup>R</sup> cassette. The plasmid also contains <i>ssel</i> and a Kan <sup>R</sup> cassette between flanking regions of the <i>phoN</i> gene. | This study                  |
| GTW234                                          | <i>E. coli</i> S17-1 $\lambda$ pir with plasmid pGW10 which has an Amp <sup>R</sup> cassette as well as a Kan <sup>R</sup> cassette between flanking regions of the <i>phoN</i> gene                                  | This study                  |
| <b>Plasmids used in this study</b>              |                                                                                                                                                                                                                       |                             |
| Plasmid Name                                    | Plasmid Description                                                                                                                                                                                                   | Reference                   |
| pssel                                           | <i>ssel</i> from <i>S. Typhimurium</i> SL1344 cloned into pACYC184                                                                                                                                                    | (McLaughlin et al., 2009)   |
| pUC4-KSAC                                       | Plasmid containing kanamycin cassette KSAC                                                                                                                                                                            | (Barany, 1985)              |
| pSW85                                           | <i>phoN</i> flanking regions cloned into pGP704                                                                                                                                                                       | (Haneda et al., 2009)       |
| pGW1                                            | pSW85 with <i>ssel</i> _460bp upstream inserted between <i>phoN</i> flanking regions I+II(fl I+II), using Sall and SacI restriction sites                                                                             | This study                  |
| pGW6                                            | Kan <sup>R</sup> cassette from pUC4-KSAC inserted into SacI site between <i>ssel</i> and flr II on pGW1                                                                                                               | This study                  |
| pGW10                                           | Kan <sup>R</sup> cassette from pUC4-KSAC inserted into SacI site between flr I and flr II on pSW85                                                                                                                    | This study                  |

**Table S3:** Primers used in this study (related to *Bacterial strains and plasmids* section in *Experimental Procedures*)

| Name                               | Primer Sequence 5' to 3'                                                                                                          |
|------------------------------------|-----------------------------------------------------------------------------------------------------------------------------------|
| AroA deletion                      | 5'-TGACGTTACAACCCATCGCGGGGTCGATGGCGCCATTAAGTGTAGGCTGGAGCTGCTTC<br>5'-CCTTTCGCAAACAGCGCCGTGGTGGCAATCGTCATCGCCGCATATGAATATCCTCCTTAG |
| AroA test                          | 5'-ATCAGCAAAAAGCGGAGTTG<br>5'-GAGTATACGCGAACGCAACC                                                                                |
| PhoN                               | 5'-CGCACCACTATTCAAAGCCG<br>5'-GCGTAAAACCATGCAGACCC                                                                                |
| <i>sseI</i> region on <i>pssel</i> | 5'-CTAGAACTAGTAGATCTCCCG<br>5'-GAAGACAGTCATAAGTGCG                                                                                |

**Table S4:** Antibodies used in this study (related to *Flow Cytometry* section in *Experimental Procedures*)

| <b>Antibodies used for flow cytometry</b> |             |                  |          |                                                          |                          |
|-------------------------------------------|-------------|------------------|----------|----------------------------------------------------------|--------------------------|
| Antibody Target                           | Clone       | Fluorophore      | Dilution | Specificity                                              | Vendor                   |
| CD103                                     | 2E7         | PerCP/Cy5.5      | 1:100    | $\alpha$ E integrin                                      | Biolegend                |
| CSA-1                                     | polyclonal  | FitC             | 1:100    | Common surface antigens of heat-killed <i>Salmonella</i> | KPL                      |
| CD11b                                     | M1/70       | BV 785           | 1:200    | $\alpha$ M $\beta$ 2 integrin                            | Biolegend                |
| CD11c                                     | HL3         | PE-Cy7           | 1:200    | $\alpha$ x $\beta$ 2 integrin                            | BD                       |
| CD45                                      | 30-F11      | BV 510           | 1:400    | Pan-CD45                                                 | Biolegend                |
| CD64                                      | X54-5/7.1   | PE               | 1:200    | Fc $\gamma$ RI                                           | Biolegend                |
| Ly6-C                                     | HK1.4       | eFluor®450       | 1:400    | Ly-6C                                                    | eBiosciences             |
| MHC II I-A/I-E                            | M5/114.15.2 | Alexa Fluor® 700 | 1:200    | MHC II                                                   | eBiosciences             |
| CD3 $\epsilon$                            | 145-2C11    | APC-eFluor® 780  | 1:100    | T cell lineage                                           | eBiosciences             |
| CD19                                      | 1D3         | APC-eFluor® 780  | 1:100    | B cells                                                  | eBiosciences             |
| CD49b                                     | DX5         | APC-eFluor® 780  | 1:100    | Pan NK cells                                             | eBiosciences             |
| TER-119                                   | TER-119     | APC-eFluor® 780  | 1:100    | Erythrocytes                                             | eBiosciences             |
| Ly-6G                                     | 1A8         | BUV395           | 1:100    | Ly-6G/<br>granulocytes                                   | BD                       |
| Mer                                       | 108928      | APC              | 1:10     | Mer (also referred to as MerTK)                          | R&D biosystems           |
| <b>Antibodies used for microscopy</b>     |             |                  |          |                                                          |                          |
| Antibody Target                           | Clone       | Fluorophore      | Dilution | Specificity                                              | Vendor                   |
| <i>Salmonella</i>                         | polyclonal  | none             | 1:1000   | Custom made against fixed <i>Salmonella</i>              | Aves (custom made)       |
| Chicken IgY                               | polyclonal  | Alexa Fluor® 594 | 1:400    | Chicken IgY                                              | Thermo Fisher Scientific |

## 1 **Supplemental Experimental Procedures:**

2

### 3 **Bacterial culture conditions:**

4 *S. Typhimurium* or *E. Coli* isolates were grown aerobically in LB broth (Fisher  
5 Scientific) or on LB agar plates (Fisher Scientific) at 37° C overnight. Overnight cultures  
6 of *Salmonella* isolates were resuspended in sterile PBS to use for mouse infections.

7 Antibiotics were used at the following concentrations when needed: streptomycin (200  
8 µg/ml, Sigma), carbencillin (100 µg/ml, Invitrogen), and kanamycin (40 µg/ml, Sigma).

9

### 10 **Construction of plasmids:**

11 To construct pGW6, the SL1344 *sseI* gene and 460 bp upstream sequence was amplified  
12 by PCR from the plasmid *psseI* (McLaughlin et al., 2009) using oligonucleotides listed in  
13 Table S3, and the 1.5 kb amplified DNA fragment was inserted into pCR2.1 using the  
14 TOPO TA cloning kit (Invitrogen) and sequenced prior to subcloning. The resulting  
15 plasmid was digested with the restriction enzymes *SalI* and *SacI* (New England BioLabs),  
16 and the extracted *sseI*-containing fragment was cloned into the *SalI* and *SacI* restriction  
17 sites between the *phoN* flanking regions on pSW85 (Haneda et al., 2009), giving rise to  
18 pGW1. The kanamycin-resistance (Kan<sup>R</sup>) cassette (KSAC) from pUC4-KSAC (Barany,  
19 1985) was then excised using *SacI* digestion and ligated using T4 DNA ligase into the  
20 compatible *SacI* site on pGW1, between the *sseI* region and the *phoN* flanking region II,  
21 generating pGW6. The *SacI*-digested Kan<sup>R</sup> cassette was also inserted directly into the  
22 *SacI* site on pSW85, between the *phoN* flanking regions, and ligated with T4 DNA ligase  
23 to produce pGW10.



24 **Construction of *Salmonella* mutants**

25 Clean deletion mutants were created via lambda-red recombination and transferred to the  
26 either ST313 *S. Typhimurium* isolate D23580 or ST19 *S. Typhimurium* isolate SL1344  
27 using P22 phage transduction as previously described (Datsenko and Wanner, 2000).  
28 Mutants were purified from contaminating phage using green plates and cross-struck  
29 against P22 H5 to confirm absence of lysogens. Complemented strains were made via  
30 allelic exchange. The complemented genes or antibiotic cassette control were inserted  
31 into the *PhoN* locus (Winter et al., 2009). Suicide plasmids were introduced into the  
32 relevant *S. Typhimurium* isolates by conjugation with a S17-1 *E. coli*  $\lambda$ *pir* donor strain.  
33 Ex-conjugants were selected on plates containing streptomycin, kanamycin and BCIP (40  
34  $\mu$ g/ml, Sigma) to screen for insertion into the *phoN* locus in the recipient strain.  
35 Complemented strains were sequenced to verify the insertion and tested for loss of the  
36 suicide plasmid.

37

38 ***Salmonella* infections:**

39 Food was removed for 4 hours prior to giving the mice a single dose of 20 mg of  
40 streptomycin (Sigma) in 100  $\mu$ l of sterile PBS orogastrically. Afterwards, mice were  
41 again supplied with food *ad libitum*. At 16 hours after streptomycin treatment, food was  
42 again removed for 4 hours prior to either orogastric or intraperitoneal inoculation with *S.*  
43 *Typhimurium* isolates. For all oral infections except those with  $\Delta$ *aroA* mutants, mice  
44 were given  $10^8$  CFU of *S. Typhimurium* in 100  $\mu$ l of sterile PBS orogastrically (Barthel et  
45 al., 2003). In experiments utilizing  $\Delta$ *aroA* mutants, mice were instead given  $10^9$  CFU of  
46 the  $\Delta$ *aroA* *Salmonella* strains orogastrically. Uninfected mice used as a control in flow

47 cytometry experiments were given 100  $\mu$ l of sterile PBS orogastrically in place of  
48 *Salmonella*. For intraperitoneal infection experiments, mice were injected  
49 intraperitoneally with  $10^3$  CFU of *S. Typhimurium* in 100  $\mu$ l of sterile PBS.  
50  
51 Mice were euthanized at the indicated time points post infection by CO<sub>2</sub> asphyxiation and  
52 either cervical dislocation or cardiac puncture as the secondary method of euthanasia.  
53 Organs were collected, weighed, and then either homogenized in PBS for CFU  
54 enumeration, prepared for histopathological examination, or used to make single cell  
55 suspensions. For certain experiments, the single cell suspensions of the MLN were used  
56 for both flow cytometry analysis and CFU enumeration. For CFU enumeration,  
57 *Salmonella* were plated on LB agar plates with either streptomycin or kanamycin as  
58 needed.

59

#### 60 **Preparation of single cell suspensions:**

61 MLN, Peyer's patches, and small intestines were removed aseptically, cleaned of  
62 mesentery and placed into RPMI (Gibco) 5% fetal bovine serum (FBS, Gibco) until ready  
63 for processing.

64

65 To create a single cell suspension, MLN were teased apart 23G1 needle and incubated in  
66 2 ml of Hank's Balanced Salt Solution (HBSS) with calcium and magnesium (Gibco)  
67 containing 25  $\mu$ g/ml Liberase TL (Sigma) and 50  $\mu$ g/ml DNase I (Life Technologies) for  
68 22-25 minutes at 37° C without agitation. The digestion was stopped by adding 5 mM  
69 EDTA (Promega). Then cells were filtered through a 70  $\mu$ m cell strainer and washed in

70 RPMI 5% FBS. Cells were resuspended in RPMI 5% FBS until they were stained for  
71 flow cytometry.  
72  
73 Peyer's patches were digested in RPMI 5% FBS with 12.5 µg/ml Liberase TL and 50  
74 µg/mL DNase I for 15 minutes at 37° C without agitation. The digestion was stopped by  
75 adding 5 mM EDTA. Then cells were filtered through 100 µm cell strainer, washed in  
76 RPMI 5% FBS, and then filtered through a 70 µm cell strainer. Samples were kept in  
77 RPMI 5% FBS until they were stained for flow cytometry.  
78  
79 Single cell suspensions of the small intestine were prepared as described previously  
80 (Geem et al., 2012). The small intestines were cut open longitudinally and washed three  
81 times by gently moving the tissue around using tweezers in PBS to remove the contents.  
82 Next, the small intestines were cut into ~0.5 cm pieces and incubated twice in 30 ml of  
83 Ca<sup>2+</sup>, Mg<sup>2+</sup> free HBSS (Gibco) with 5% FBS and 2 mM EDTA (Promega) for 20 minutes  
84 at 37° C with shaking at 200 rpm. Tissues were rinsed in PBS and then minced. The  
85 minced tissue was incubated in 20 ml of Ca<sup>2+</sup>, Mg<sup>2+</sup> free HBSS with 5% FBS, 1.5 mg/ml  
86 Collagenase Type VIII (Sigma), and 250 µg/ml Dnase I (Life Technologies) for 12  
87 minutes at 37° C with shaking at 200 rpm. Samples were immediately filtered through a  
88 100 µm cell strainer into a tube containing 25 ml of RPMI 5% FBS to stop the digestion.  
89 The cells were pelleted by centrifugation washed in RPMI 5% FBS and filtered through  
90 both 70 µm and 40 µm cell strainers. Samples were kept in RPMI 5% FBS until staining.  
91  
92

93 **Cell Staining and Flow cytometry:**

94 Single cell suspensions were blocked in FACS buffer (PBS, 2% FBS, 2 mM EDTA) with  
95 10  $\mu$ g/ml TruStain fcX (Biolegend) for 10-15 minutes on ice. Samples were washed  
96 twice in PBS and stained for 20 minutes on ice for viability (Live/Dead fixable Blue  
97 Viability dye, Invitrogen) and surface antigens. Cells were washed twice with FACS  
98 buffer and then fixed and permeabilized for 12 minutes on ice using BD  
99 Cytotfix/Cytoperm solution (BD). After fixation, samples were washed twice in BD  
100 Perm/Wash buffer (BD) and stained for intracellular *Salmonella* for 30 minutes on ice.  
101 After intracellular staining, cells were washed twice Perm/Wash buffer and once in  
102 FACS buffer. Finally, samples were resuspended in FACS buffer for flow cytometry  
103 analysis. Multiparameter analysis of single cell suspensions was performed using BD  
104 Biosciences Fortessa (Becton Dickinson) and analyzed using FlowJo (TreeStar).

105

106 Cell populations of interest were gated as follows. All cell populations of interest were  
107 gated as Live/Dead Fixable Blue<sup>-</sup>, lineage<sup>-</sup> (CD3 $\epsilon$ <sup>-</sup>, CD19<sup>-</sup>, CD49b<sup>-</sup>, Ter-119<sup>-</sup>), and single  
108 cells, so these characteristics will be omitted for brevity. MLN inflammatory monocytes  
109 were gated as Ly6C<sup>Hi</sup>CD11b<sup>+</sup>Ly6G<sup>-</sup>. Patrolling monocytes in the MLN were gated as  
110 Ly6C<sup>lo</sup>CD11b<sup>+</sup>Ly6G<sup>-</sup>. In the MLN, neutrophils were gated as Ly6C<sup>int</sup>CD11b<sup>Hi</sup>Ly6G<sup>+</sup>.  
111 MLN Macrophages were gated as CD64<sup>+</sup>MerTK<sup>+</sup>CD11b<sup>+</sup>Ly6G<sup>-</sup>Ly6C<sup>-</sup>. Migratory DC in  
112 the MLN were gated as MHC II<sup>Hi</sup>CD11c<sup>var</sup>. Figure S2 visually shows the gating scheme  
113 for MLN migratory DC. In the MLN, migratory DC were further gated into three subsets:  
114 MHC II<sup>Hi</sup>CD11c<sup>var</sup>CD103<sup>+</sup>CD11b<sup>-</sup>, MHC II<sup>Hi</sup>CD11c<sup>var</sup>CD103<sup>+</sup>CD11b<sup>+</sup>, MHC  
115 II<sup>Hi</sup>CD11c<sup>var</sup>CD103<sup>-</sup>CD11b<sup>+</sup> (Figure 4a). In the small intestine and Peyer's patches, DC

116 were gated as CD45<sup>+</sup>CD11c<sup>+</sup>MHC II<sup>+</sup>CD64<sup>-</sup>. CSA-1<sup>+</sup> (anti-*Salmonella* common surface  
117 antigen) cells of all cell types were considered infected. The CSA-1<sup>+</sup> gate was drawn to  
118 minimize the autofluorescent and nonspecific signal that fell within the gate in uninfected  
119 control samples.

120

121 The total amount of cells of a cell type of interest per MLN was calculated as follows.  
122 The frequency of live cells of the population of interest from FlowJo was multiplied by  
123 the number of Trypan Blue<sup>-</sup> cells per MLN. The amount of Trypan Blue<sup>-</sup> cells per MLN  
124 was determined using a hemocytometer.

125

#### 126 **Fluorescent Immunohistochemistry:**

127 MLN were harvested, frozen in OCT compound (Fisher Scientific), and frozen sections  
128 10-12 μm in thickness were placed on SuperFrost Plus cryosection slides (Fisher  
129 Scientific). Sections were fixed in ice-cold acetone at 4° C for 10 minutes and then  
130 allowed to dry. A boundary was drawn around each individual section using a pap pen  
131 (Fisher Scientific). Sections were washed with PBS and then blocked with 10% normal  
132 goat serum in staining buffer (PBS with 3% bovine serum albumin, 1% saponin, 0.1 %  
133 triton and 0.02% sodium azide) for 1 hour at room temperature. After blocking, sections  
134 were stained with the primary anti-*Salmonella* antibody in staining buffer overnight at 4°  
135 C. The next day, sections were washed and then stained for 2 hours at room temperature  
136 with anti-chicken IgY antibody and phalloidin Alexa Fluor 488 (Life technologies).  
137 Slides were washed in PBS and then mounted using ProLong Diamond (Life  
138 Technologies). Images were acquired on a Zeiss LSM 880 confocal microscope with the

139 ZEN 2010 software (Zeiss). Samples were imaged with using the tile-scan function and a  
140 63x oil-immersion objective. Images were acquired at a frame size of 2048x2048 with  
141 16-bit depth and processed using FIJI (Schindelin et al., 2012). Scale bars are set at  
142 50µm.

143

#### 144 **Histology**

145 Tissues were fixed in 10% neutral buffered formalin. After fixation, tissues were  
146 routinely processed for paraffin embedding and stained with hematoxylin and eosin. A  
147 semiquantitative scoring system of 0 to +5 was used (0 = no significant lesion, +1 =  
148 minimal, +2 = mild, +3 = moderate, +4 = marked, +5 = severe) to evaluate the ceca of  
149 infected mice. A blinded pathologist evaluated the location and severity of any pathology.  
150 The pathology score was the numeric total for all lesions for each mouse, and the  
151 pathology score was compared between groups.

152

#### 153 **Cell culture and *in vitro* infections**

154 Bone marrow-derived dendritic cells (BMDCs) were generated from mouse bone marrow  
155 following the standard procedures described in Lutz et al., 1999. In brief, bone marrow  
156 from femurs and tibias was flushed with DMEM, washed once with PBS, then plated in  
157 BMDC media (DMEM High Glucose (Gibco) with 10% Fetal Bovine Serum (Gibco), 10  
158 mM HEPES (Gibco), 40 mM β-mercaptoethanol (Sigma), and 20 ng/ml recombinant  
159 murine Granulocyte Macrophage Colony Stimulating Factor (GM-CSF, Peprotech). Cells  
160 were harvested and seeded at day 10, when routinely greater than 90% of cells were  
161 positive for the DC marker CD11c.

162 In 24 well plates,  $2.5 \times 10^5$  cells were seeded per well over night. *Salmonella* cultures  
163 were grown overnight. The next day, plates were centrifuged for 5 minutes at 1000 rpm,  
164 before the addition of the respective *Salmonella* strains at a multiplicity of infection of  
165 10. The infection was synchronized by again centrifuging BMDCs for 5 minutes at 1000  
166 rpm. The *Salmonella* strains were allowed to infect for 30 minutes. After 30 min,  
167 BMDCs were centrifuged again for 5 min at 1000 rpm and then gentamicin-containing  
168 media was added to a final concentration of 100  $\mu\text{g/ml}$  for 1.5 hours. At 2 hours post  
169 infection (hpi) BMDCs were centrifuged for 5 min. at 1000 rpm, and then were washed 3  
170 times in PBS with centrifugation for 5 minutes at 1000 rpm before each new wash step to  
171 minimize loss of BMDCs. After washing, intracellular CFU was enumerated or the media  
172 was replaced with BMDC media containing 10  $\mu\text{g/ml}$  gentamicin for the duration of the  
173 experiment. Intracellular CFU was measured at 2, 8 and 22 hpi. To measure intracellular  
174 CFU, BMDCs were lysed using 1% triton-x for 5 minutes at room temperature and then  
175 CFU was enumerated by plating. The percent invasion was quantified as the intracellular  
176 CFU recovered at 2 hpi over the initial input. The percent survival over time was  
177 normalized to the intracellular CFU recovered at 2 hpi.

178

179 **Supplemental References:**

180

- 181 Barany, F., 1985. Two-codon insertion mutagenesis of plasmid genes by using single-  
182 stranded hexameric oligonucleotides. Proc. Natl. Acad. Sci. U.S.A. 82, 4202–4206.  
183 Datsenko, K.A., Wanner, B.L., 2000. One-step inactivation of chromosomal genes in  
184 *Escherichia coli* K-12 using PCR products. Proc. Natl. Acad. Sci. U.S.A. 97, 6640.  
185 Haneda, T., Winter, S.E., Butler, B.P., Wilson, R.P., Tukel, C., Winter, M.G., Godinez,  
186 I., Tsolis, R.M., Bäumlner, A.J., 2009. The Capsule-Encoding *viaB* Locus Reduces  
187 Intestinal Inflammation by a *Salmonella* Pathogenicity Island 1-Independent  
188 Mechanism. Infect. Immun. 77, 2932–2942. doi:10.1128/IAI.00172-09  
189 Lutz, M.B., Kukutsch, N., Ogilvie, A.L.J., Rößner, S., Koch, F., Romani, N., Schuler, G.,  
190 1999. An advanced culture method for generating large quantities of highly pure  
191 dendritic cells from mouse bone marrow. J Immunol. Meth. 223, 77–92.

192      doi:10.1016/S0022-1759(98)00204-X  
193  
194  
195  
196  
197
